**Regional Topological Aberrances of White Matter- and Gray Matter-based Functional Networks for Attention Processing may Foster Traumatic Brain Injury-Related Attention Deficits in Adults**

Ziyan Wu <sup>1</sup>, Meng Cao <sup>2</sup>, Xin Di <sup>2</sup>, Kai Wu <sup>3</sup>, Yu Gao <sup>4</sup>, and Xiaobo Li <sup>1,2,\*</sup>

<sup>1</sup> Department of Electrical and Computer Engineering, New Jersey Institute of Technology, Newark, NJ, USA

<sup>2</sup> Department of Biomedical Engineering, New Jersey Institute of Technology, Newark, NJ, USA

<sup>3</sup> School of Biomedical Sciences and Engineering, South China University of Technology, Guangzhou, China

<sup>4</sup> Department of Psychology, Brooklyn College and the Graduate Center of the City University of New York, Brooklyn, NY, USA

\*Correspondence:

Xiaobo Li, PhD

Associate Professor of Biomedical Engineering

New Jersey Institute of Technology

323 Martin Luther King Blvd, Fenster 613

Newark, NJ 07102

**Phone:** 973-596-5880, **Fax:** 973-596-5222, **Email:** xli.aecom@gmail.com, xiaobo.li@njit.edu

**Funding:** This work was supported by research grants from the New Jersey Commission on Brain Injury Research [CBIR17PIL012] and the National Institutes of Mental Health [R03MH109791, R15MH117368].

## **ABSTRACT**

Traumatic brain injury (TBI) is highly prevalent in adults. TBI-related functional brain alterations have been linked with common post-TBI neurobehavioral sequelae, with unknown neural sub-strates. This study examined the systems-level functional brain alterations in white matter (WM) and gray matter (GM) for visual sustained attention processing, their interactions, and contribution to post-TBI attention deficits. Task-based functional MRI data were collected from 42 adults with TBI and 43 group-matched normal controls (NCs), and analyzed using the graph theoretic technique. Global and nodal topological properties were calculated and compared between the two groups. Correlation analyses were conducted between the neuroimaging measures that showed significant between-group differences and the behavioral symptom measures in attention domain in the groups of TBI and NCs, respectively. Significantly altered nodal efficiency and/or degree in several WM and GM nodes were reported in the TBI group, including the posterior corona radiata (PCR), posterior thalamic radiation (PTR), postcentral gyrus (PoG), and superior temporal sulcus (STS). Subjects with TBI also demonstrated abnormal systems-level functional synchronization between the PTR and STS in the right hemisphere, hypo-interaction between PCR and PoG in the left hemisphere; as well as the involvement of systems-level functional aberrances in PCR in TBI-related behavioral impairments in the attention domain. Findings of the current study suggest that TBI-related systems-level functional alterations associated with these two major association WM tracts and their anatomically connected GM regions may play critical role in TBI-related behavioral deficits in attention domain.

**Keywords:** traumatic brain injury (TBI); post-TBI attention deficits; visual sustained attention task (VSAT); graph theoretic technique (GTT); white matter tracts

## 1. Introduction

Traumatic brain injury (TBI) is one of the major public health concerns that occurs primarily in young adults [1]. TBI-related functional brain alterations, such as disruptive functional connectivity (FC) among distributed neural networks that support cognitive processes and behavioral control, have been frequently reported and suggested to likely link with severe post-TBI neurobehavioral sequelae [2-5]. Among the severe post-TBI neurobehavioral consequences, attention deficits have been found to be most commonly reported and can persist and create lifelong challenges to the affected individuals [6-8]. However, brain mechanisms associated with post-TBI attention deficits have not yet been sufficiently investigated.

Although TBI-induced tissue damages in both Gray Matter (GM) and White matter (WM) have been widely reported, WM tracts are suggested to be particularly vulnerable to mechanical shearing and stretch forces of TBI [9, 10]. Diffusion-MRI (dMRI) studies in adults with chronic TBI have reported microstructural anomalies in various WM regions and their association with post-TBI attention deficits. In specific, Raj et al reported increased mean diffusivity (MD) and radial diffusivity (RD) values in the genu of corpus callosum (CC) in adult patients with chronic TBI, and their associations with altered behavioral performance in an attention task [11]. Similarly, Jun et al, demonstrated that TBI subjects with chronic postconcussive syndrome had significantly reduced fractional anisotropy (FA) in the genu of CC, relative to healthy controls; and the poorer CC alignment was significantly correlated with longer reaction time in response to the Attention Network Test (ANT) [12]. Relative to matched controls, adult patients with TBI have also been found to have significantly decreased FA in the posterior corona radiata (PCR), which strongly contribute to lower neuropsychological test scores in the attention domain [13] and poorer attentional control performance quantified using

the ANT [14]. In addition, adult patients with TBI have also shown significantly lower MD in superior longitudinal fasciculus, anterior midbody of CC and cerebral isthmus, which were all suggested to link to post-TBI attention problems [15].

The vast majority of functional MRI (fMRI) studies in TBI have focused on the GM regions. And only a handful of these existing GM-based functional brain studies have attempted to address the neural substrates of TBI-related attention deficits. In specific, an early task-based fMRI study reported decreased brain activation in anterior cingulate cortex in a small sample of adult patients with moderate-to-severe TBI patients as compared to healthy controls, during a block-designed modified stroop task [16]. Another early study reported significantly reduced neural activations in posterior parietal cortex, frontal eye fields and ventrolateral prefrontal cortex during attentional disengagement in adults with mild TBI, relative to group-matched controls [17]. In addition, increased activation in bilateral middle frontal and supplementary motor cortices during visual sustained attention processing was reported in adults with moderate to severe TBI [18]. By utilizing the functional near-infrared spectroscopy (fNIRS) technique, Hibino et al reported significantly increased medial frontal activation and decreased lateral frontal activation in a small sample of young adult patients with severe TBI as compared to healthy controls, during performance of an attention task [19]. By utilizing the FC technique, Bonnelle et al reported significant associations between altered within-default mode network FC (specifically interactions between precuneus and other brain regions including ventromedial prefrontal cortices, inferior parietal cortices, middle temporal and frontal gyri, thalami, and parahippocampal gyri in bilateral hemispheres) and behavioral impairments when performing a choice reaction time task in adult subjects with TBI [20]. Significantly increased resting-state FC within the sensorimotor network and its association with impairments in the attention domain

have also been reported in a relatively larger sample of adults with moderate and severe TBI, relative to controls [21]. Our recent fNIRS study found that young adults with mild and moderate TBI showed significantly higher inferior frontal-occipital FC for sustained attention processing, and the abnormally increased FC were significantly correlated with more hyperactive/impulsive symptoms in the TBI group [22].

Recently, accumulating evidence has highlighted the existence and reliability of blood oxygen level-dependent (BOLD) signal fluctuations in WM [23-28], enabling the identification of functional communications across large distances among distributed WM networks. The development of graph theoretic technique has enabled us to assess the complex and interactive patterns of multiple remote brain regions that are affected by the diffuse axonal injury nature of TBI, which has the potential to provide informative findings in uncovering network abnormalities in TBI [29-32]. To our best knowledge, only one recent study has explored alterations of WM network topology in a cohort of patients with TBI, which reported enhanced FCs among large-scale WM networks involving inferior fronto-occipital fasciculus, primary sensorimotor, occipital and pre/postcentral WM networks [33]. Nevertheless, systems-level TBI-related functional brain alterations in both GM and WM, their interactions and contribution to post-TBI attention deficits, have not yet been fully addressed.

The present study has enrolled 42 young adults with TBI and 43 group-matched controls to examine the systems-level TBI-related functional brain characteristics in both GM and WM and their interactions during visual sustained attention processing, and their contribution to post-TBI behavioral impairments in attention domain. On the bases of findings from our and other research teams [34-36], we hypothesize that a) relative to the matched controls, adults with TBI would show significant and interactive topological alterations in the WM and GM functional

organizations involving attention processing, particularly in the major WM tracts that play critical role in attentional deployment (including parts of the corona radiata [14, 37], thalamocortical radiation [38], and superior longitudinal fasciculus [39, 40]) as well as the frontal and parietal GM regions that are subserved by these proposed WM tracts for the bottom-up and top-down attentional and cognitive control processes; and b) the regional topological aberrances, especially those in the WM network that also significantly interact with regional GM topological anomalies, significantly contribute to elevated inattentive and/or hyperactive/impulsive behaviors in adults with TBI.

## **2. Materials and Methods**

### **2.1. Participants**

A total of 85 young adults (18 to 27 years of age) were involved in this study. Forty-two (including 21 males and 21 females) had a history of TBI, and 43 (including 23 males and 20 females) were group-matched normal controls (NCs). Specific inclusion criteria for the TBI group were: having a history of one or multiple sports- or recreation-related (i.e., tobogganing/sledding, amusement attractions) TBIs clinically confirmed at least 6 months prior to the study appointment, having non-penetrating head injury which caused diffuse brain damage (according to medical records), and having no history of diagnosis with any sub-presentation of attention-deficit/hyperactivity disorder (ADHD) prior to the first onset TBI. Specific inclusion criteria for NCs were: having no history of TBI, having no history of diagnosed ADHD (any sub-presentation), and having T-scores < 60 for inattentive, hyperactive/impulsive, and combined symptoms in Conner's Adult ADHD Self-Reporting Rating Scales (CAARS) [41], which were administered during study assessments. General inclusion criteria for both subject groups were:

native or fluent speakers of English, strongly right-handed measured using the Edinburgh Handedness Inventory [42]. None of the involved participants reported a history or current diagnosis of any neurological disorder (such as Epilepsy), severe psychiatric disorder (including Schizophrenia, Autism Spectrum Disorders, Major Depression, Anxiety, Conduct Disorder, etc.), received treatment with any stimulant or non-stimulant psychotropic medication within the month prior to testing, or having MRI constraints such as metal implants, claustrophobia, etc.

Participants in both groups were recruited from the New Jersey Institute of Technology (NJIT) through on-campus study flyers. Demographic and clinical characteristics of the involved participants were summarized in **Table 1**. The study received Institutional Reviewed Board Approvals at NJIT. Written informed consents were provided by all participants.

**Table 1:** Demographic, clinical/behavioral, and task performance measures of the study sample.

|                                     | <b>NC<br/>(N=43)</b> | <b>TBI<br/>(N=42)</b> |                |
|-------------------------------------|----------------------|-----------------------|----------------|
|                                     | <b>Mean (SD)</b>     | <b>Mean (SD)</b>      | <b>p Value</b> |
| Age                                 | 22.36 (2.74)         | 21.63 (2.00)          | .167           |
| Education year                      | 14.98 (1.95)         | 14.26 (1.56)          | .066           |
| Mother's education year             | 15.35 (2.20)         | 15.55 (2.70)          | .710           |
| Father's education years            | 15.77 (2.81)         | 15.50 (2.78)          | .660           |
| CAARS scores                        |                      |                       |                |
| Inattentive raw scores              | 4.67 (2.81)          | 9.31 (6.28)           | < .001         |
| Inattentive T-scores                | 45.88 (6.48)         | 57.02 (15.18)         | < .001         |
| Hyperactive/impulsive raw scores    | 5.07 (2.76)          | 9.19 (5.80)           | < .001         |
| Hyperactive/impulsive T-scores      | 42.58 (5.93)         | 52.52 (14.66)         | < .001         |
|                                     | <b>N (%)</b>         | <b>N (%)</b>          | <b>p Value</b> |
| Male                                | 23 (53.49)           | 21 (50.00)            | .917           |
| Right-handed                        | 43 (100)             | 42 (100)              | 1.000          |
| Race/Ethnicity                      |                      |                       | .094           |
| Caucasian                           | 12 (27.91)           | 21 (50.00)            |                |
| Black or African American           | 4 (9.30)             | 7 (2.38)              |                |
| Asian                               | 20 (46.51)           | 9 (21.43)             |                |
| Hispanic/Latino                     | 2 (4.65)             | 2 (4.76)              |                |
| More than one race                  | 5 (11.63)            | 3 (7.14)              |                |
| fMRI Task performance measures      | <b>Mean (SD)</b>     | <b>Mean (SD)</b>      |                |
| Accuracy rate                       | 0.99 (0.04)          | 0.99 (0.01)           | 0.344          |
| Omission error rate                 | 0.009 (0.03)         | 0.001 (0.005)         | 0.131          |
| Commission error rate               | 0.003 (0.01)         | 0.005 (0.01)          | 0.464          |
| Overall response reaction time (ms) | 607.09 (134.73)      | 604.45 (132.83)       | 0.928          |
| Correct response reaction time(ms)  | 606.72 (135.02)      | 603.83 (132.47)       | 0.921          |

NC: normal control; TBI: traumatic brain injury; N: number of subjects; SD: standard deviation; p: level of significance; CAARS: Conner's adult ADHD self-reporting rating scales; ms: milliseconds.

## 2.2. Experimental Task for fMRI Acquisition

During fMRI acquisition, each subject performed a block-designed visual sustained attention task (VSAT). The VSAT has been validated for its feasibility of measuring behavioral and functional capacity of sustained attention in both children and adults [22, 43-47]. Detailed design of the task was described in our previous studies [22, 46, 47]. Briefly, it consists of five task blocks interleaved by five rest blocks (**Supplementary Figure S1**). Each block lasts for 30 seconds. During the rest blocks, the participant was instructed to keep their eyes open and to remain as relaxed and motionless as possible. In each of the five task blocks, a red cross appeared in the center of the computer screen and lasts for 800 milliseconds. Then a target sequence of three-digit sets (1-3-5, 2-5-8, 3-7-9, 5-2-7 and 6-1-8, respectively) were shown in red at the rate of one digit per 400 milliseconds. After a 1.0-second break, nine sequences of three digits, ranging from 1 to 9, appeared in black in a pseudo-random order at the rate of 400 milliseconds per digit. A 1.8 second response period ensued after each sequence. In this response period, the subject was asked to press the left button of a response box with the forefinger of their right hand when the stimulus sequence (black ones) matched the target sequence (red ones), and to press the right button with the middle finger otherwise. The total duration of the entire task was 5 minutes.

Prior to fMRI acquisition, a short training version of the task was provided to each participant to ensure that they understood the requirements of the task. Task performances including response accuracy rate, omission error rate, commission error rate and overall/correct response reaction time were examined in each subject (as shown in **Table 1**).

## 2.3. Experimental Setup and MRI Data Acquisition



Before the MRI scan, a pre-metal check was completed for ensuring the safety of the experiment. Each participant was then positioned on a moveable examination table. Earplugs were offered to attenuate scanner noise. Head motion was restrained with positioning pads. A bolster was set under the participants' knees to help stay still and maintain the correct position during imaging. A head coil capable of sending and receiving radio waves was placed above the participant's head. A mirror was positioned on the head coil, allowing the participant to see the visual stimuli that were performed by screen of a computer-guided projector. A two-button response box was provided for responding to the task stimuli. In addition, a squeeze ball was provided, in case the participant wanted to alert the technologist or terminate the scan.

MRI data were collected using a 3-Tesla 32 channel Siemens TRIO (Siemens Medical System) scanner at the Rutgers University Brain Imaging Center. fMRI data were obtained using a gradient echo-planar sequence with the following parameters: repetition time (TR)=1000 ms; echo time (TE)=28.8 ms; flip angle=30°; field of view=208 mm; voxel size=1.5×1.5×2.0 mm<sup>3</sup> with no gap; slice number=55. High-resolution 3D T1-weighted structural images were collected using a magnetization-prepared rapid gradient echo sequence with the following parameters: TR=1900 ms; TE=2.52 ms; flip angle=9°; field of view=250 mm; voxel size=1.0×1.0×1.0 mm<sup>3</sup>; slice number=176.

#### **2.4. Individual-level fMRI Data Preprocessing**

The fMRI data were preprocessed using the FMRIB Software Library v6.0 FEAT Toolbox (<https://fsl.fmrib.ox.ac.uk/fsl/fslwiki/FSL>). An initial visual check was first applied to each set of fMRI data for any missing volumes or severe head motions. Motion artifacts were then corrected by applying the rigid-body transformations [48], with the motion parameters, including the displacement (translation along the x, y and z-axes) and rotation around these axes, were

estimated using the first volume as reference. No participant was excluded for excessive head motion, with a strict cutoff threshold of displacement = 1.0 mm. Next, the acquisition time between slices was corrected, non-brain structures were extracted. To improve the signal-to-noise ratio, images were further smoothed with a 4-mm full-width-at-half-maximum Gaussian kernel. A high-pass temporal filter of 1/75 Hz was implemented for low-frequency noise removal. Then, each fMRI data was co-registered to the structural MRI data of the same subject and normalized into the ICBM152\_T1\_2mm Montreal Neurological Institute (MNI) template [48, 49]. The task-based whole brain activation map was then generated by using the FMRIB's Improved Linear Model tool [50]. Motion parameters were regressed out from each fMRI data for residual effects removal. Finally, each Z-statistic map was cluster-thresholded with the value of  $Z > 2.3$  and at the significance level of  $p < 0.05$  [51].

## **2.5. WM Functional Network Node Selection**

In order to select the nodes for WM functional network construction, a combined power spectrum map was first generated (**Figure 1A**). Power spectrum, which measures the signal's power contained in a time signal at specific oscillatory frequencies [52, 53], has been identified as a unique and repeatable feature for quantifying synchronous BOLD signals in WM [54]. To generate the study cohort-specific power spectrum map, a weighted-WM mask was first created (in the MNI space) in each subject, using the segmentation tool in FreeSurfer v.6.0 (<https://surfer.nmr.mgh.harvard.edu/>). Then each weighted-WM mask was binarized using a threshold of 0.5 (meaning that the current voxel had a >50% possibility for being classified into WM). Next, a weighted group-WM mask was generated by combining the binarized WM masks from all the individuals. It was then binarized using a threshold of 0.8, i.e. the current voxel had a >80% possibility for being included in the individual WM masks. Furthermore, this binarized

group-WM mask was parcellated into 48 WM tracts in the MNI space, using the Johns Hopkins University (JHU) ICBM-DTI-81 WM labels atlas [55].

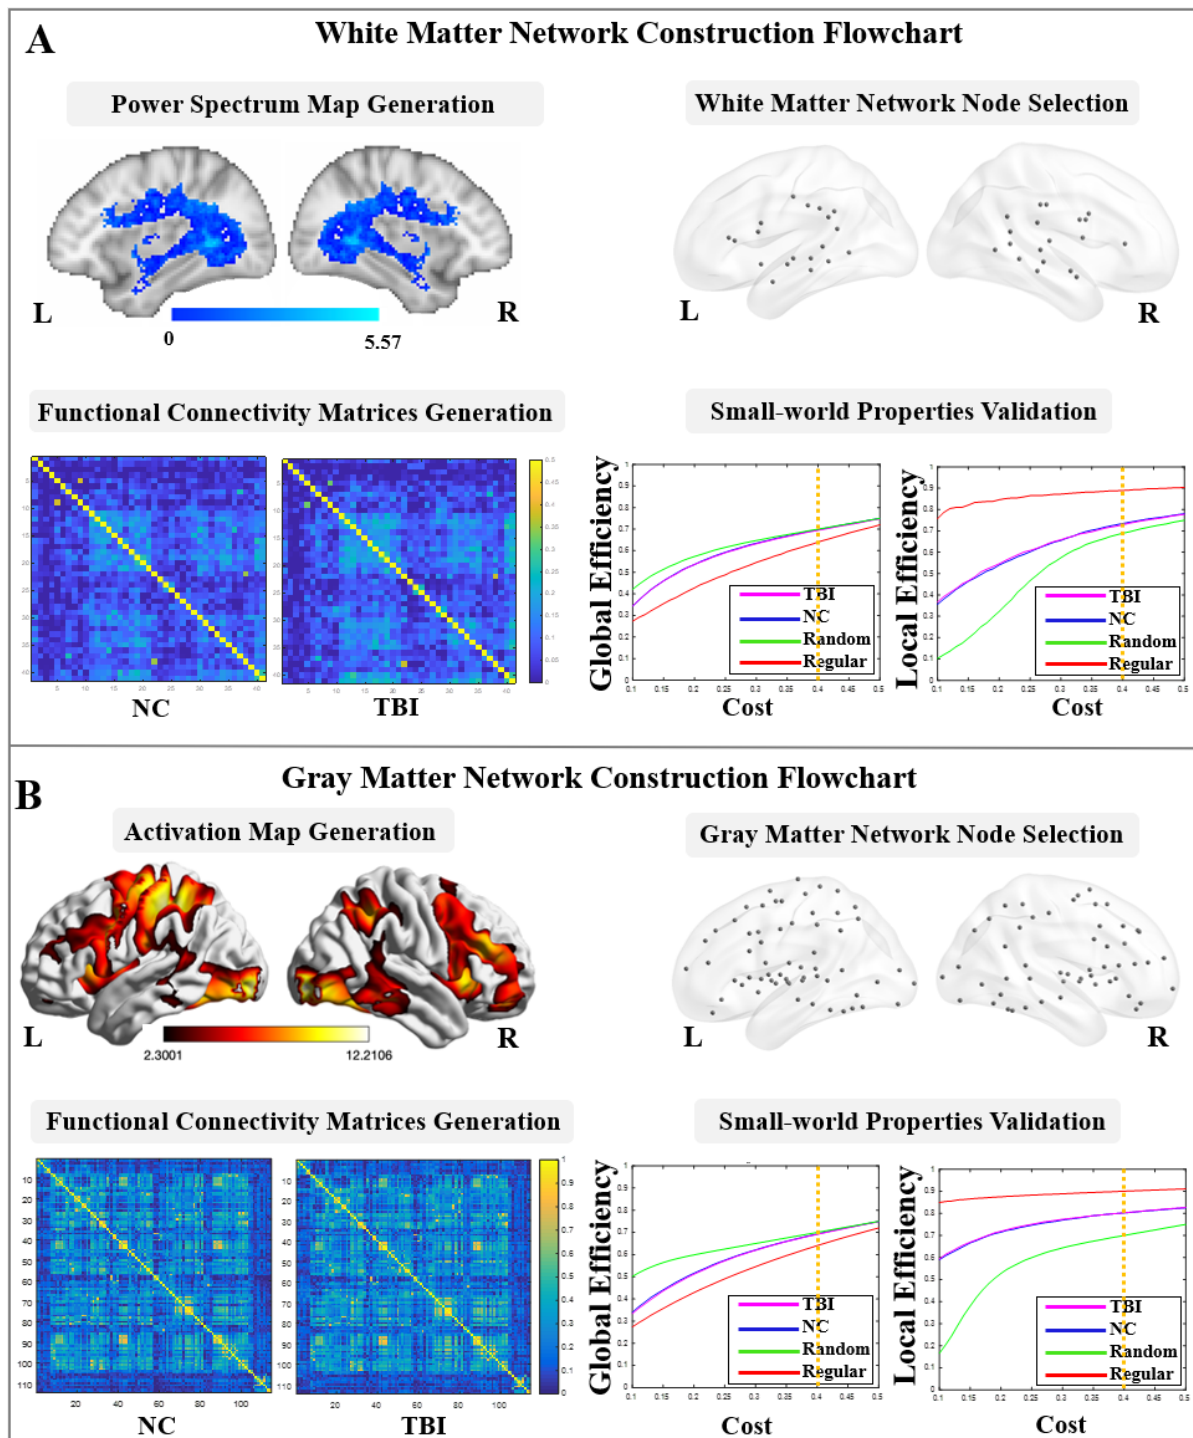

**Figure 1.** White matter and gray matter functional networks construction. (A) White matter network construction flowchart, including power spectrum map generation, node selection, functional connectivity matrices generation, and brain network small-world properties validation; (B) Gray matter network construction flowchart, including

brain activation map generation, node selection, functional connectivity matrices generation, and brain network small-world properties validation. (L: left hemisphere; R: right hemisphere; NC: normal control; TBI: traumatic brain injury)

For each individual, time series of the preprocessed fMRI data were extracted using the 48 parcellated WM masks, and then normalized by converting a individual's raw score into the standard z scores to avoid outlier issues. Power spectrum value of each voxel was estimated using the fast Fourier transform under the frequency of 0.017 Hz, which has been validated by previous fMRI studies in WM [24, 56]. A total of 41 WM nodes (spheres with radius = 2 mm) were then placed at the identified activation peaks (local power spectrum maximum). Considering that the myelinated axon caliber varied in different WM tracts [57], we additionally validated these WM nodes by overlapping each of the spherical node with its associated JHU WM tract mask. Detailed information of the 41 nodes were listed in the **Supplementary Table S1**.

## **2.6. WM Functional Network Construction and Topological Property Estimations**

In each subject, the BOLD time series of the voxels in each of the 41 WM nodes were extracted from the preprocessed fMRI data. Then, a wavelet-based approach was applied to the signals of the 41 nodes for denoising [58]. This technique provides multi-frequency information about signals, and is known to be effective for identifying non-stationary events caused by motion and for detecting transient phenomena, such as spikes [58]. In specific, the time series of each voxel were decomposed in the wavelet domain, using the Maximal Overlap Discrete Wavelet Transform. Wavelet scales 3, 4 and 5 which provided information on the frequency band in 0.015-0.125 Hz range, being denoted to contain the majority of the task-related hemodynamic information [59-62]), were then reconstructed to the time series signal in each voxel and averaged within each node.

Next, a  $41 \times 41$  FC matrix was generated for each fMRI data using the absolute values of the Pearson's correlation coefficients. Furthermore, an averaged FC matrix was generated among participants belonging to the groups of NC and TBI, respectively (**Figure 1A**), and further converted into a binary graph, by using the network cost,  $C$  as threshold value. The network cost was defined as:

$$C = K/(N(N - 1)/2), \quad (\text{Eq.1})$$

where  $K$  is the total number of possible edges and  $N$  the total number of nodes in the network [63]. In order to identify the small-world regime [64] in both groups, we calculated two global metrics, including global-efficiency and local-efficiency for the two groups and their node- and degree-matched regular and random networks over a wide range of the cost values from 0.1 to 0.5 using increments of 0.01. The selected cost value range was commonly suggested in previous studies, allowing proper estimation of the small-world properties [47, 65, 66]. The network global-efficiency,  $E_{network-glob}(G)$ , was defined as the inverse of the average characteristic path length between all nodes in the network, using the following equation [63]:

$$E_{network-glob}(G) = \frac{1}{n(n-1)} \sum_{i,j \in G, j \neq i} \frac{1}{d_{ij}}, \quad (\text{Eq.2})$$

where  $n$  is the number of network nodes, and  $d_{ij}$  the inverse of the shortest path length between nodes  $i$  and  $j$ . The network local efficiency,  $E_{network-loc}$ , quantifies the inverse of the shortest average path length of all neighbors of a given node among themselves, which can be calculated using the following formula [63, 65, 67]:

$$E_{network-loc}(G) = \frac{1}{n} \sum_{i \in G} E_{network-glob}(G_i), \quad (\text{Eq.3})$$

where,  $G_i$  represents the subnetwork that contains all neighbor nodes of node  $i$ , and  $E_{network-glob}(G_i)$  the subnetwork global-efficiency calculated using equation (2). A network is considered as “small-world” if it meets the criteria:

$E_{network-glob}(G_{regular}) < E_{network-glob}(G) < E_{network-glob}(G_{random})$  and  $E_{network-loc}(G_{random}) < E_{network-loc}(G) < E_{network-loc}(G_{regular})$ , where  $E_{network-glob}(G_{regular})$ ,  $E_{network-glob}(G_{random})$ ,  $E_{network-loc}(G_{regular})$ , and  $E_{network-loc}(G_{random})$  represent the network global-efficiency and network local-efficiency of the node- and degree-matched regular and random networks, respectively [64]. As shown in **Figure 1A**, we observed that the locations of the global- and local-efficiency curves of both groups were between the corresponding curves of the random and regular graphs within the range of 0.1 to 0.4.

Finally, network topological properties in each subject, including 4 global-level properties (network global-efficiency, network local-efficiency, network CC and network degree), and 5 nodal-level properties, including nodal global- and nodal local-efficiency, nodal CC, nodal degree, and betweenness centrality (BC), were estimated and averaged over the range of the cost values from 0.1 to 0.4. Definition regarding the network properties have been detailed in previous studies [63, 65, 67, 68]. Briefly, the nodal-efficiency,  $E_{nodal}(G, i)$ , was a local measurement which evaluated the communication efficiency between a node  $i$  and all other nodes in the network  $G$ , by using the following equation [63]:

$$E_{nodal}(G, i) = \frac{1}{n-1} \sum_{j \in G, j \neq i} \frac{1}{d_{ij}}, \quad (\text{Eq.4})$$

where  $d_{ij}$  was the shortest path length between nodes  $i$  and  $j$ . The nodal CC,  $CC(G)$ , estimates the likelihood of whether the neighboring nodes of a node  $i$  were interconnected with each other, which was defines as [68]:

$$CC(G) = \frac{1}{n} \sum_{i \in G} \frac{1}{k_i(k_i-1)} \times \sum_{j,h \in G_i} (a_{ij} a_{ih} a_{jh})^{1/3}, \quad (\text{Eq.5})$$

where  $a_{ij}$  was the connection between nodes  $i$  and  $j$ , with the value 1 for connected and 0 for not connected, and  $k_i$  the number of neighbors of node  $i$ . The nodal degree was defined as the number of edges connected to a node  $i$ , and the BC of a node  $i$  estimated the proportion of all the shortest paths between pairs of other nodes in the network that include that node [67].

## 2.7. GM Functional Network Node Selection

In order to select the nodes for GM functional network construction, a combined activation map was first generated based on the combination (union) of the brain clusters in the average activation maps of the groups of NC and TBI (**Figure 1B**). This combined activation map was then parcellated according to the FC-based Brainnetome atlas [69], which divides the whole brain GM into 210 cortical and 36 subcortical subregions. Among the 246 parcellated cortical and subcortical GM regions in the combined activation map, a total of 114 regions contained more than 100 contiguous voxels that were significantly activated during the task performance. Therefore, 114 GM nodes were placed as spheres (radius = 4 mm) at the identified activation peaks (local activation maximum). The size of the node was determined based on the estimation of average cortical thickness of adult human brain [70, 71]. Detailed information of the 114 nodes were listed in the **Supplementary Table S2**.

## 2.8. GM Functional Network Construction and Topological Properties Calculation

Time series of the 114 GM nodes were first extracted from each fMRI data. The wavelet-based approach, which has been described in Section 2.6, was applied to denoise the signals in the 114 GM nodes. Then a  $114 \times 114$  FC matrix for each fMRI data was generated through averaged time series within each pair of the GM node, and the group-averaged FC matrices were constructed in the groups of NC and TBI, respectively (**Figure 1B**). The average FC matrix in each group was converted into a binary graph, by using the network cost as threshold value

(defined in Eq. 1). The small-world regime [64] was also identified in GM functional network analysis. As shown in **Figure 1B**, locations of the global- and local-efficiency curves of both groups were between the corresponding curves of the random and regular graphs within the range of 0.1 to 0.4. Thus, GM network properties including the 4 global-level topological properties (network global-efficiency, network local-efficiency, network CC and network degree), and 5 nodal-level topological properties (nodal global- and nodal local-efficiency, nodal CC, nodal degree, and BC) were then estimated and averaged over the range of the cost values from 0.1 to 0.4.

## **2.9. Group-Level Analyses**

### **2.9.1. Demographic, clinical/behavioral, and task performance measures**

The demographic, clinical/behavioral, and task performance measures were compared between the groups of NC and TBI, by using Chi-square test for discrete variables (i.e., gender and race/ethnicity) and independent samples t-test for continuous variables.

### **2.9.2. Topological properties of WM and GM functional networks**

Group comparisons of the WM and GM network topological measures (including both global- and nodal-level measures) were first carried out using one-way analysis of covariance, with gender as a fixed-effect covariate and age, participant's education level, and participant parents' education level as random-effect covariates. For topological measures that showed significant between-group differences, post-hoc t-tests were further compared between the NC and TBI groups. Multiple comparisons were controlled for the results in both steps using Bonferroni correction [72] at  $\alpha = 0.05$ .

### **2.9.3. WM and GM functional network interaction analysis**



For all the WM and GM nodes that reported significant between-group differences in any of the 5 nodal-level topological properties, pair-wise Pearson's correlation analysis of each nodal-level topological measure was conducted in each diagnostic group, respectively. Multiple comparisons were controlled using Bonferroni correction [72] at  $\alpha = 0.05$ .

#### **2.9.4. Brain-behavior relationship analysis**

Brain-behavior relationships were investigated in each diagnostic group using Partial correlation, between the neuroimaging measures that had significant between-group differences and the raw-scores of the CAARS inattentive and hyperactive symptoms subscale scores, by controlling age, participant's education level, and participant parents' education level. Again, multiple comparisons were controlled using Bonferroni correction [72] at  $\alpha = 0.05$ .

### **3. Results**

#### **3.1. Demographic, clinical/behavioral, and task performance measures**

Demographic characteristics and task performance measurements showed no significant between-group differences. All participants achieved > 95 % responding accuracy when performing the experimental task during fMRI. Relative to NCs, individuals with TBI showed significantly higher inattentive, and hyperactive symptom scores (**Table 1**).

#### **3.2. Topological properties of WM and GM networks**

The WM and GM network global- and local-efficiency measures did not significantly differ between the two groups. Group comparisons of WM network nodal properties showed that relative to NCs, individuals with TBI had significantly higher nodal local-efficiency ( $t=2.143$ ,  $p=0.035$  after Bonferroni correction) in left PCR, and significantly lower nodal global-efficiency ( $t=-2.072$ ,  $p=0.042$  after Bonferroni correction) in right posterior thalamic radiation (PTR). Group comparisons of GM network nodal properties showed that relative to controls, the TBI

group had significantly higher nodal degree ( $t=2.246$ ,  $p=0.027$  after Bonferroni correction) and nodal global-efficiency ( $t=2.426$ ,  $p=0.036$  after Bonferroni correction) in left postcentral gyrus (PoG), and significantly higher nodal local-efficiency ( $t=2.016$ ,  $p=0.047$  after Bonferroni correction) in right superior temporal sulcus (STS).

### **3.3. Interactions of WM vs. GM network topological properties**

In the group of controls, nodal local-efficiency of left PCR in WM was significantly positive correlated with nodal degree ( $r=0.363$ ,  $p=0.017$  after Bonferroni correction) and nodal global-efficiency ( $r=0.330$ ,  $p=0.031$  after Bonferroni correction) of left PoG in GM. Whereas in the group of TBI, nodal local-efficiency of left PCR in WM showed a significant negative correlation with nodal degree of left PoG ( $r=-0.320$ ,  $p=0.039$  after Bonferroni correction) and a trend of significantly negative correlation with nodal global-efficiency of left PoG ( $r=-0.277$ ,  $p=0.075$  after Bonferroni correction) in GM; and the nodal global-efficiency of right PTR in WM was significantly positively correlated with nodal local-efficiency of right STS ( $r=0.353$ ,  $p=0.022$  after Bonferroni correction) in GM (**Figure 2**).

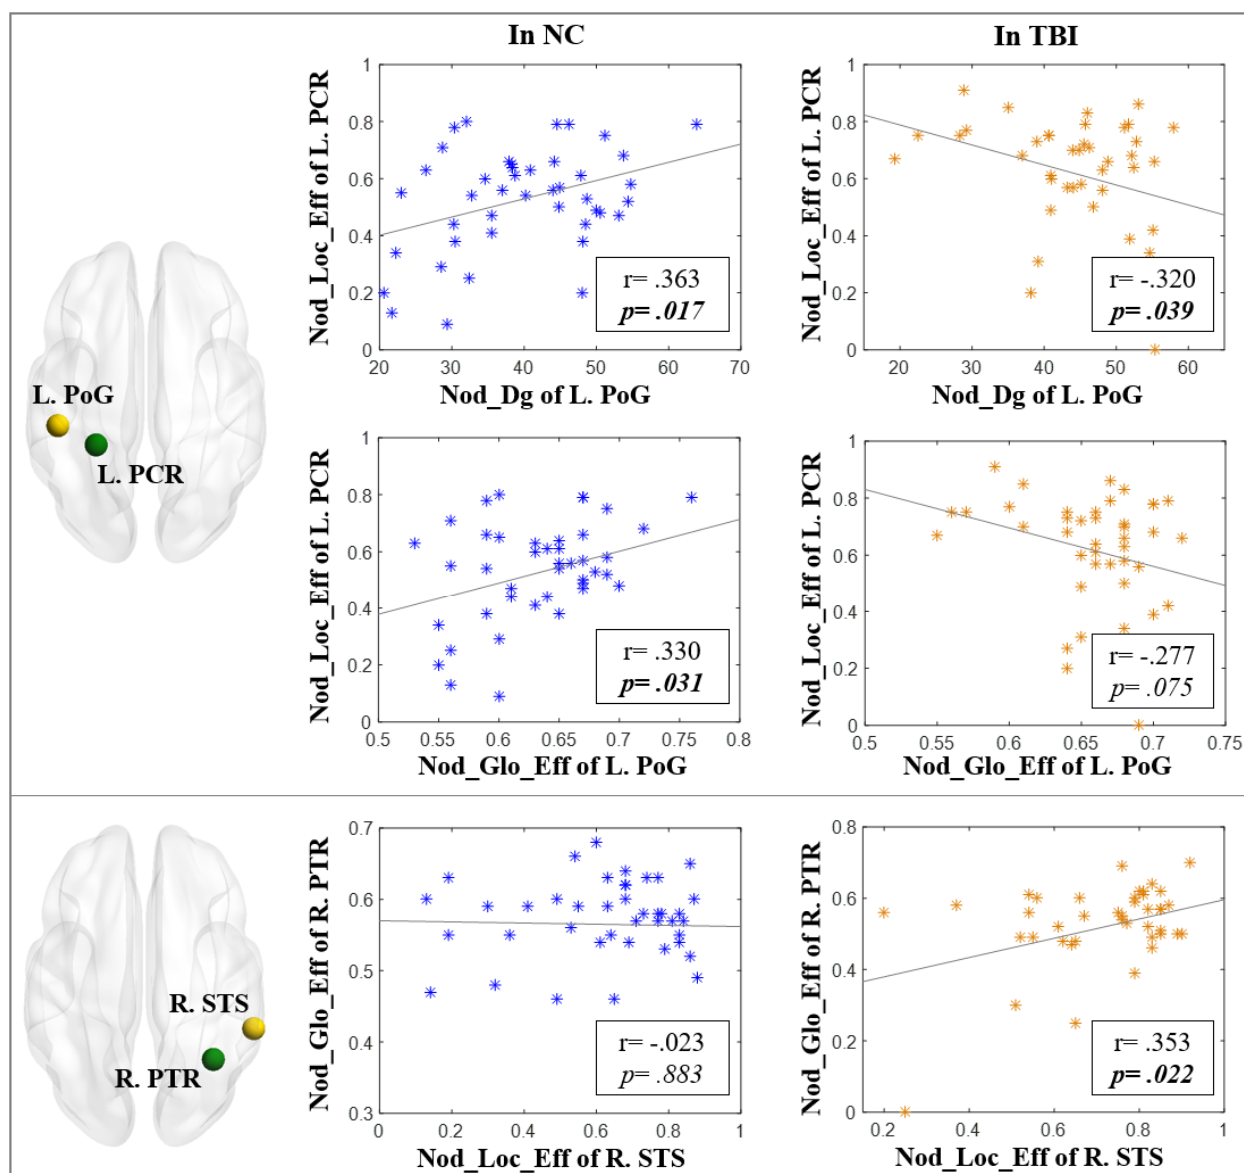

**Figure 2.** Interactions of white matter (marked in green) vs. gray matter (marked in yellow) network topological properties in the groups of NC and TBI. (NC: normal control; TBI: traumatic brain injury; r: correlation coefficient; p: level of significance; L.: left hemisphere; R.: right hemisphere; PoG: postcentral gyrus; PCR: posterior corona radiata; STS: superior temporal sulcus; PTR: posterior thalamic radiation; Nod\_Dg: nodal degree; Nod\_Loc\_Eff: nodal local-efficiency; Nod\_Glo\_Eff: nodal global-efficiency)

### 3.4. Brain-behavior relationships

BC of left PCR in WM demonstrated a trend of significant negative correlation with raw-scores of the CAARS hyperactive symptoms ( $r = -0.292$ ,  $p = 0.075$ ) in the group of TBI, however, such pattern was not found in controls (**Figure 3**).

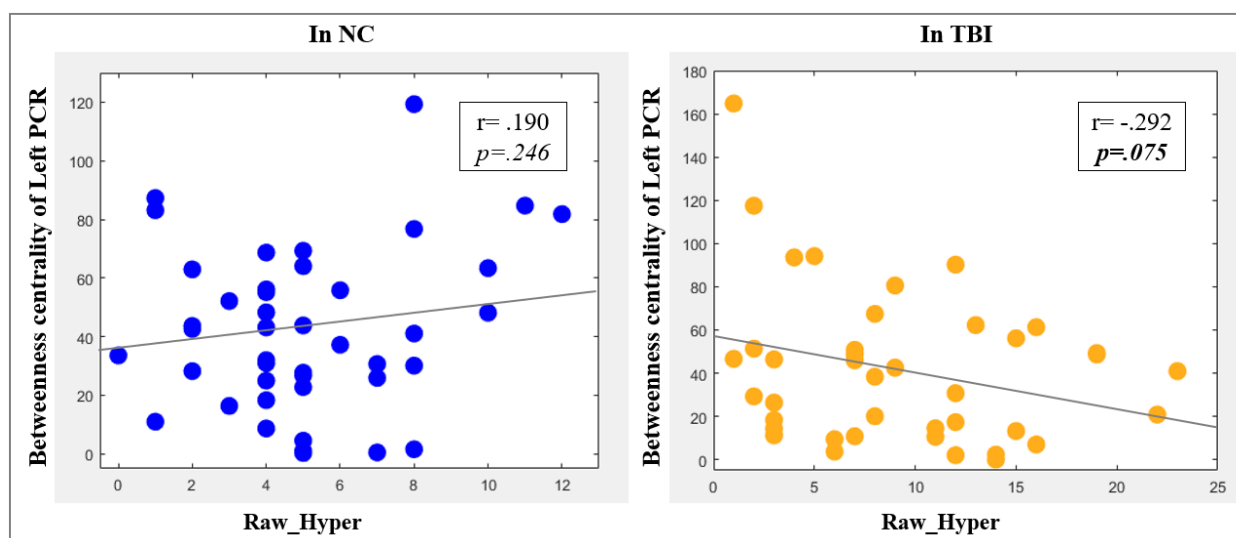

**Figure 3.** Brain-behavior relationships in the groups of NC and TBI. (NC: normal controls; TBI: traumatic brain injury; PCR: posterior corona radiata; Raw\_Hyper: raw-scores of the Conner's adult ADHD self-reporting rating scales (CAARS) hyperactive symptoms; r: correlation coefficient; p: level of significance)

#### 4. Discussion

The current study, for the first time in the field, investigated the functional network organizations in both WM and GM during sustained attention processing and their inter-actions with post-TBI behavioral attention deficits in adults with TBI. Relative to the matched controls, individuals with TBI demonstrated abnormally higher ability of information propagation (represented by significantly increased nodal local-efficiency [64]) of the left PCR, as well as lower functional integration (represented by significantly decreased nodal global-efficiency [73]) of the right PTR in WM. The TBI group also showed significantly higher functional integration and connectivity strength (represented by significantly increased nodal global/nodal-efficiency and degree) of the left PoG and right STS in GM, when compared with the group of controls. In the systems-level, subjects with TBI also demonstrated abnormally strong functional synchronization between the PTR and STS in the right hemisphere, as well as hypo-interaction between PCR and PoG in the left hemisphere.

As the most prominent projection fiber, PCR contains both ascending and descending fibers that connect subcortical nuclei and primary sensory cortex, including the PoG in parietal lobe [74, 75]. The PTR, also referred to as thalamocortical radiations, connects fibers extending from subcortical regions to visual and sensorimotor cortices [76]. However, there is no evidence showing any major branches of the PTR anatomically connecting the STS. The PCR, PTR, and the cortical and subcortical GM regions anatomically connected with these two major association WM tracts, have been widely validated to play critical role in normal attentional deployment [77-87]. Previous dMRI studies in adults with TBI have frequently reported microstructural abnormalities, including reduced FA and increased MD and RD in PCR and PTR [13, 88, 89]. Structural MRI studies have also reported regional cortical abnormalities in PoG and STS [90-92]. Merging into these existing results, our findings suggest that TBI-related abnormal topological properties associated with PCR and PTR in WM, PoG and STS in GM, and their abnormal functional interactions in the WM/GM functional networks for attentional information processing, may be partially underlined by the structural anomalies in these critical WM and GM regions subserving attention and higher order cognitive information processing.

Our analyses of brain-behavior relationships showed that decreased BC of left PCR was correlated with elevated hyperactive/impulsive symptoms in subjects with TBI. This is the first time in the field demonstrating the linkage of systems-level functional aberrances in PCR with TBI-related behavioral impairments in the attention domain. Indeed, TBI-related functional and structural alterations in cortical and subcortical regions, which are structurally connected by PCR, and their significant involvement in altered attentional control have been demonstrated in existing neuroimaging studies. For instance, enhanced brain activations during executive control processing were observed in multiple subregions within the frontal lobe, a key component of the

ascending fibers of PCR [74, 75], in male TBI patients [82]. GM tissue integrity reduction of thalamic nuclei, which are involved in PCR descending pathways [74, 75], were found to be associated with poorer performance for attention processing in adult TBI patients [84]. Taken together, our results suggest that reduced ability for functional information flow control (which can be measured using the BC property) in PCR and its anatomically connected GM regions may significantly contribute to post-TBI attention problems, including behavioral hyperactivity, in adults with TBI.

There are some issues associated with this study that need to be further discussed. First, our study sample included both male and female subjects. Clinical studies have reported sex-specific patterns of post-TBI cognitive and behavioral impairments [93-96]. However, findings from neuroimaging studies on sex-related brain mechanisms associated with TBI are far from converging, with some reported differentiated values of functional or structural neuroimaging measures between males and females with TBI [97, 98], while others observed no significant between-sex differences [99]. Our supplementary analyses in the clinical, behavioral, and topological measures in both WM and GM networks did not report any significant between-sex differences in the TBI or control groups. Second, among the 42 subjects in the TBI group, 24 had one TBI, 18 had multiple TBIs. Clinical studies have examined the impact of repetitive TBI on neuropsychological and behavioral impairments and demonstrated contradictory results [100-105]. As another supplementary test, we conducted Pearson's correlation between the behavioral scores of the CAARS inattentive and hyperactive/impulsive symptoms and the number of TBIs in the patient group and did not find any significant results. In addition, the locations of brain injury varied in our TBI subjects. All the subjects in our TBI group have been recruited from the NJIT sports teams. Most of them received a rapid forward or backward force and several had the

violent blow occurred to the left or right side of the brain during sports-related or recreative activities. There exists a concern in the field that different cognitive and/or behavioral problems may be caused by injuries to specific locations of the head (<https://msktc.org/tbi/factsheets/Understanding-TBI/Brain-Injury-Impact-On-Individuals-Functioning>). Although there is no evidence yet suggested direct impact of injury location on cognitive and behavioral impairments, its potential influence should be investigated in future in a much larger study sample.

## 5. Acknowledgements

Dr. Xiaobo Li designed the study. Dr. Ziyang Wu worked on literature searching, clinical and imaging data analyses, and wrote the first draft of the manuscript. Meng Cao also worked on the imaging data analyses. Drs. Xin Di, Kai Wu, Yu Gao, and Xiaobo Li edited and revised the manuscript. All authors contributed to and have approved the final manuscript.

## 6. Funding

This work was supported by research grants from the New Jersey Commission on Brain Injury Research [CBIR17PIL012] and the National Institutes of Mental Health [R03MH109791, R15MH117368].

## References

1. Frieden, T.R., Houry, D., Baldwin G., et al. Report To Congress On Traumatic Brain Injury In The United States: Epidemiology and Rehabilitation. Centers for Disease Control and Prevention, National Center for Injury Prevention and Control, Division of Unintentional Injury Prevention. [https://www.cdc.gov/traumaticbraininjury/pubs/congress\\_epi\\_rehab.html](https://www.cdc.gov/traumaticbraininjury/pubs/congress_epi_rehab.html)
2. Castellanos, N.P.; Leyva, I.; Buldu, J.M.; Bajo, R.; Paul, N.; Cuesta, P.; Ordonez, V.E.; Pascua, C.L.; Boccaletti, S.; Maestu, F.; et al. Principles of recovery from traumatic brain injury: reorganization of functional networks. *Neuroimage* 2011, 55, 1189-1199, doi:10.1016/j.neuroimage.2010.12.046.

3. Sharp, D.J.; Scott, G.; Leech, R. Network dysfunction after traumatic brain injury. *Nat Rev Neurol* 2014, 10, 156-166, doi:10.1038/nrneurol.2014.15.
4. Kinnunen, K.M.; Greenwood, R.; Powell, J.H.; Leech, R.; Hawkins, P.C.; Bonnelle, V.; Patel, M.C.; Counsell, S.J.; Sharp, D.J. White matter damage and cognitive impairment after traumatic brain injury. *Brain* 2011, 134, 449-463, doi:10.1093/brain/awq347.
5. Owens, J.A.; Spitz, G.; Ponsford, J.L.; Dymowski, A.R.; Willmott, C. An investigation of white matter integrity and attention deficits following traumatic brain injury. *Brain Inj* 2018, 32, 776-783, doi:10.1080/02699052.2018.1451656.
6. Bramlett, H.M.; Dietrich, W.D. Long-Term Consequences of Traumatic Brain Injury: Current Status of Potential Mechanisms of Injury and Neurological Outcomes. *J Neurotrauma* 2015, 32, 1834-1848, doi:10.1089/neu.2014.3352.
7. Daneshvar, D.H.; Riley, D.O.; Nowinski, C.J.; McKee, A.C.; Stern, R.A.; Cantu, R.C. Long-term consequences: effects on normal development profile after concussion. *Phys Med Rehabil Clin N Am* 2011, 22, 683-700, ix, doi:10.1016/j.pmr.2011.08.009.
8. Ruttan, L.; Martin, K.; Liu, A.; Colella, B.; Green, R.E. Long-term cognitive outcome in moderate to severe traumatic brain injury: a meta-analysis examining timed and untimed tests at 1 and 4.5 or more years after injury. *Arch Phys Med Rehabil* 2008, 89, S69-76, doi:10.1016/j.apmr.2008.07.007.
9. Armstrong, R.C.; Mierzwa, A.J.; Marion, C.M.; Sullivan, G.M. White matter involvement after TBI: Clues to axon and myelin repair capacity. *Exp Neurol* 2016, 275 Pt 3, 328-333, doi:10.1016/j.expneurol.2015.02.011.
10. Braun, M.; Vaibhav, K.; Saad, N.M.; Fatima, S.; Vender, J.R.; Baban, B.; Hoda, M.N.; Dhandapani, K.M. White matter damage after traumatic brain injury: A role for damage associated molecular patterns. *Biochim Biophys Acta Mol Basis Dis* 2017, 1863, 2614-2626, doi:10.1016/j.bbadis.2017.05.020.
11. Kumar, R.; Saksena, S.; Husain, M.; Srivastava, A.; Rathore, R.K.; Agarwal, S.; Gupta, R.K. Serial changes in diffusion tensor imaging metrics of corpus callosum in moderate traumatic brain injury patients and their correlation with neuropsychometric tests: a 2-year follow-up study. *J Head Trauma Rehabil* 2010, 25, 31-42, doi:10.1097/HTR.0b013e3181bff331.
12. Maruta, J.; Suh, M.; Niogi, S.N.; Mukherjee, P.; Ghajar, J. Visual tracking synchronization as a metric for concussion screening. *J Head Trauma Rehabil* 2010, 25, 293-305, doi:10.1097/HTR.0b013e3181e67936.
13. Kraus, M.F.; Susmaras, T.; Caughlin, B.P.; Walker, C.J.; Sweeney, J.A.; Little, D.M. White matter integrity and cognition in chronic traumatic brain injury: a diffusion tensor imaging study. *Brain* 2007, 130, 2508-2519, doi:10.1093/brain/awm216.
14. Niogi, S.N.; Mukherjee, P.; Ghajar, J.; Johnson, C.E.; Kolster, R.; Lee, H.; Suh, M.; Zimmerman, R.D.; Manley, G.T.; McCandliss, B.D. Structural dissociation of attentional control and memory in adults with and without mild traumatic brain injury. *Brain* 2008, 131, 3209-3221, doi:10.1093/brain/awn247.
15. Pal, D.; Gupta, R.K.; Agarwal, S.; Yadav, A.; Ojha, B.K.; Awasthi, A.; Rathore, R.K.; Pandey, C.M.; Narayana, P.A. Diffusion tensor tractography indices in patients with frontal lobe injury and its



correlation with neuropsychological tests. *Clin Neurol Neurosurg* 2012, 114, 564-571, doi:10.1016/j.clineuro.2011.12.002.

16. Soeda, A.; Nakashima, T.; Okumura, A.; Kuwata, K.; Shinoda, J.; Iwama, T. Cognitive impairment after traumatic brain injury: a functional magnetic resonance imaging study using the Stroop task. *Neuroradiology* 2005, 47, 501-506, doi:10.1007/s00234-005-1372-x.
17. Mayer, A.R.; Mannell, M.V.; Ling, J.; Elgie, R.; Gasparovic, C.; Phillips, J.P.; Doezema, D.; Yeo, R.A. Auditory orienting and inhibition of return in mild traumatic brain injury: a fMRI study. *Hum Brain Mapp* 2009, 30, 4152-4166, doi:10.1002/hbm.20836.
18. Kim, J.; Whyte, J.; Patel, S.; Europa, E.; Slattery, J.; Coslett, H.B.; Detre, J.A. A perfusion fMRI study of the neural correlates of sustained-attention and working-memory deficits in chronic traumatic brain injury. *Neurorehabil Neural Repair* 2012, 26, 870-880, doi:10.1177/1545968311434553.
19. Hibino, S.; Mase, M.; Shirataki, T.; Nagano, Y.; Fukagawa, K.; Abe, A.; Nishide, Y.; Aizawa, A.; Iida, A.; Ogawa, T.; et al. Ox-yhemoglobin changes during cognitive rehabilitation after traumatic brain injury using near infrared spectroscopy. *Neurol Med Chir (Tokyo)* 2013, 53, 299-303.
20. Bonnelle, V.; Leech, R.; Kinnunen, K.M.; Ham, T.E.; Beckmann, C.F.; De Boissezon, X.; Greenwood, R.J.; Sharp, D.J. Default mode network connectivity predicts sustained attention deficits after traumatic brain injury. *J Neurosci* 2011, 31, 13442-13451, doi:10.1523/JNEUROSCI.1163-11.2011.
21. Shumskaya, E.; van Gerven, M.A.; Norris, D.G.; Vos, P.E.; Kessels, R.P. Abnormal connectivity in the sensorimotor network predicts attention deficits in traumatic brain injury. *Exp Brain Res* 2017, 235, 799-807, doi:10.1007/s00221-016-4841-z.
22. Wu, Z.; Mazzola, C.A.; Catania, L.; Owoeye, O.; Yaramothu, C.; Alvarez, T.; Gao, Y.; Li, X. Altered cortical activation and connectivity patterns for visual attention processing in young adults post-traumatic brain injury: A functional near infrared spectroscopy study. *CNS Neurosci Ther* 2018, doi:10.1111/cns.12811.
23. Gawryluk, J.R.; Mazerolle, E.L.; D'Arcy, R.C. Does functional MRI detect activation in white matter? A review of emerging evidence, issues, and future directions. *Front Neurosci* 2014, 8, 239, doi:10.3389/fnins.2014.00239.
24. Mazerolle, E.L.; D'Arcy, R.C.; Beyea, S.D. Detecting functional magnetic resonance imaging activation in white matter: interhemispheric transfer across the corpus callosum. *BMC Neurosci* 2008, 9, 84, doi:10.1186/1471-2202-9-84.
25. Yarkoni, T.; Barch, D.M.; Gray, J.R.; Conturo, T.E.; Braver, T.S. BOLD correlates of trial-by-trial reaction time variability in gray and white matter: a multi-study fMRI analysis. *PLoS One* 2009, 4, e4257, doi:10.1371/journal.pone.0004257.
26. Fabri, M.; Polonara, G.; Mascioli, G.; Salvolini, U.; Manzoni, T. Topographical organization of human corpus callosum: an fMRI mapping study. *Brain Res* 2011, 1370, 99-111, doi:10.1016/j.brainres.2010.11.039.
27. Gawryluk, J.R.; Mazerolle, E.L.; Brewer, K.D.; Beyea, S.D.; D'Arcy, R.C. Investigation of fMRI activation in the internal capsule. *BMC Neurosci* 2011, 12, 56, doi:10.1186/1471-2202-12-56.

28. Fabri, M.; Polonara, G. Functional topography of human corpus callosum: an FMRI mapping study. *Neural Plast* 2013, 2013, 251308, doi:10.1155/2013/251308.
29. Han, K.; Chapman, S.B.; Krawczyk, D.C. Disrupted Intrinsic Connectivity among Default, Dorsal Attention, and Frontoparietal Control Networks in Individuals with Chronic Traumatic Brain Injury. *J Int Neuropsychol Soc* 2016, 22, 263-279, doi:10.1017/S1355617715001393.
30. Pandit, A.S.; Expert, P.; Lambiotte, R.; Bonnelle, V.; Leech, R.; Turkheimer, F.E.; Sharp, D.J. Traumatic brain injury impairs small-world topology. *Neurology* 2013, 80, 1826-1833, doi:10.1212/WNL.0b013e3182929f38.
31. Messe, A.; Caplain, S.; Pelegrini-Issac, M.; Blancho, S.; Levy, R.; Aghakhani, N.; Montreuil, M.; Benali, H.; Lehericy, S. Specific and evolving resting-state network alterations in post-concussion syndrome following mild traumatic brain injury. *PLoS One* 2013, 8, e65470, doi:10.1371/journal.pone.0065470.
32. Yan, H.; Feng, Y.; Wang, Q. Altered Effective Connectivity of Hippocampus-Dependent Episodic Memory Network in mTBI Survivors. *Neural Plast* 2016, 2016, 6353845, doi:10.1155/2016/6353845.
33. Jia, X.; Chang, X.; Bai, L.; Wang, Y.; Dong, D.; Gan, S.; Wang, S.; Li, X.; Yang, X.; Sun, Y.; et al. A Longitudinal Study of White Matter Functional Network in Mild Traumatic Brain Injury. *J Neurotrauma* 2021, 38, 2686-2697, doi:10.1089/neu.2021.0017.
34. Meier, T.B.; Bergamino, M.; Bellgowan, P.S.; Teague, T.K.; Ling, J.M.; Jeromin, A.; Mayer, A.R. Longitudinal assessment of white matter abnormalities following sports-related concussion. *Hum Brain Mapp* 2016, 37, 833-845, doi:10.1002/hbm.23072.
35. Cubon, V.A.; Putukian, M.; Boyer, C.; Dettwiler, A. A diffusion tensor imaging study on the white matter skeleton in individuals with sports-related concussion. *J Neurotrauma* 2011, 28, 189-201, doi:10.1089/neu.2010.1430.
36. Chamard, E.; Lassonde, M.; Theoret, H. Neurometabolic, electrophysiological, and imaging abnormalities. *Prog Neurol Surg* 2014, 28, 75-85, doi:10.1159/000358766.
37. Stave, E.A.; De Bellis, M.D.; Hooper, S.R.; Woolley, D.P.; Chang, S.K.; Chen, S.D. Dimensions of Attention Associated With the Microstructure of Corona Radiata White Matter. *J Child Neurol* 2017, 32, 458-466, doi:10.1177/0883073816685652.
38. Wright, N.F.; Vann, S.D.; Aggleton, J.P.; Nelson, A.J. A critical role for the anterior thalamus in directing attention to task-relevant stimuli. *J Neurosci* 2015, 35, 5480-5488, doi:10.1523/JNEUROSCI.4945-14.2015.
39. Chiang, H.L.; Chen, Y.J.; Lo, Y.C.; Tseng, W.Y.; Gau, S.S. Altered white matter tract property related to impaired focused attention, sustained attention, cognitive impulsivity and vigilance in attention-deficit/hyperactivity disorder. *J Psychiatry Neurosci* 2015, 40, 325-335, doi:10.1503/jpn.140106.
40. Klarborg, B.; Skak Madsen, K.; Vestergaard, M.; Skimminge, A.; Jernigan, T.L.; Baare, W.F. Sustained attention is associated with right superior longitudinal fasciculus and superior parietal white matter microstructure in children. *Hum Brain Mapp* 2013, 34, 3216-3232, doi:10.1002/hbm.22139.

41. Epstein, J.N., Johnson, D., & Conners, C. K. Conners' adult ADHD diagnostic interview for DSM-IV. North Tonawanda, NY: Multi-Health Systems. 2006.
42. Oldfield, R.C. The assessment and analysis of handedness: the Edinburgh inventory. *Neuropsychologia* 1971, 9, 97-113.
43. Barkley RA, D.G., McMurray MB. Comprehensive evaluation of attention deficit disorder with and without hyperactivity as defined by research criteria. *J Consult Clin Psychol* 1990.
44. Halperin, J.M.; O'Brien, J.D.; Newcorn, J.H.; Healey, J.M.; Pascualvaca, D.M.; Wolf, L.E.; Young, J.G. Validation of hyperactive, aggressive, and mixed hyperactive/aggressive childhood disorders: a research note. *J Child Psychol Psychiatry* 1990, 31, 455-459, doi:10.1111/j.1469-7610.1990.tb01582.x.
45. Tana, M.M., E. Cerutti, S. Bianchi, AM. Exploring cortical attentional system by using fMRI during a Continuous Performance Test. *Comput Intell Neurosci* 2010, 329213.
46. Li, X.; Sroubek, A.; Kelly, M.S.; Lesser, I.; Sussman, E.; He, Y.; Branch, C.; Foxe, J.J. Atypical pulvinar-cortical pathways during sustained attention performance in children with attention-deficit/hyperactivity disorder. *J Am Acad Child Adolesc Psychiatry* 2012, 51, 1197-1207 e1194, doi:10.1016/j.jaac.2012.08.013.
47. Xia, S.; Foxe, J.J.; Sroubek, A.E.; Branch, C.; Li, X. Topological organization of the "small-world" visual attention network in children with attention deficit/hyperactivity disorder (ADHD). *Front Hum Neurosci* 2014, 8, 162, doi:10.3389/fnhum.2014.00162.
48. Jenkinson, M.; Bannister, P.; Brady, M.; Smith, S. Improved optimization for the robust and accurate linear registration and motion correction of brain images. *Neuroimage* 2002, 17, 825-841, doi:10.1016/s1053-8119(02)91132-8.
49. Jenkinson, M.; Smith, S. A global optimisation method for robust affine registration of brain images. *Med Image Anal* 2001, 5, 143-156.
50. Smith, S.M.; Jenkinson, M.; Woolrich, M.W.; Beckmann, C.F.; Behrens, T.E.; Johansen-Berg, H.; Bannister, P.R.; De Luca, M.; Drobnjak, I.; Flitney, D.E.; et al. Advances in functional and structural MR image analysis and implementation as FSL. *Neuroimage* 2004, 23 Suppl 1, S208-219, doi:10.1016/j.neuroimage.2004.07.051.
51. Woolrich, M.W.; Ripley, B.D.; Brady, M.; Smith, S.M. Temporal autocorrelation in univariate linear modeling of FMRI data. *Neuroimage* 2001, 14, 1370-1386, doi:10.1006/nimg.2001.0931.
52. Pang, J.C.; Robinson, P.A. Power spectrum of resting-state blood-oxygen-level-dependent signal. *Phys Rev E* 2019, 100, 022418, doi:10.1103/PhysRevE.100.022418.
53. Duff, E.P.; Johnston, L.A.; Xiong, J.; Fox, P.T.; Mareels, I.; Egan, G.F. The power of spectral density analysis for mapping endogenous BOLD signal fluctuations. *Hum Brain Mapp* 2008, 29, 778-790, doi:10.1002/hbm.20601.
54. Li, M.; Gao, Y.; Ding, Z.; Gore, J.C. Power spectra reveal distinct BOLD resting-state time courses in white matter. *Proc Natl Acad Sci U S A* 2021, 118, doi:10.1073/pnas.2103104118.
55. Mori, S.; Oishi, K.; Jiang, H.; Jiang, L.; Li, X.; Akhter, K.; Hua, K.; Faria, A.V.; Mahmood, A.; Woods, R.; et al. Stereotaxic white matter atlas based on diffusion tensor imaging in an ICBM template. *Neuroimage* 2008, 40, 570-582, doi:10.1016/j.neuroimage.2007.12.035.

56. Sharma, S.; Zhang, Y. Fourier transform power spectrum is a potential measure of tissue alignment in standard MRI: A multiple sclerosis study. *PLoS One* 2017, 12, e0175979, doi:10.1371/journal.pone.0175979.
57. Perge, J.A.; Niven, J.E.; Mugnaini, E.; Balasubramanian, V.; Sterling, P. Why do axons differ in caliber? *J Neurosci* 2012, 32, 626-638, doi:10.1523/JNEUROSCI.4254-11.2012.
58. Mallat, S. *A Wavelet Tour of Signal Processing*; Academic Press: Academic Press, 1998.
59. Achard, S.; Salvador, R.; Whitcher, B.; Suckling, J.; Bullmore, E. A resilient, low-frequency, small-world human brain functional network with highly connected association cortical hubs. *J Neurosci* 2006, 26, 63-72, doi:10.1523/JNEUROSCI.3874-05.2006.
60. Bassett, D.S.; Wymbs, N.F.; Porter, M.A.; Mucha, P.J.; Carlson, J.M.; Grafton, S.T. Dynamic reconfiguration of human brain networks during learning. *Proc Natl Acad Sci U S A* 2011, 108, 7641-7646, doi:10.1073/pnas.1018985108.
61. Ginestet, C.E.; Simmons, A. Statistical parametric network analysis of functional connectivity dynamics during a working memory task. *Neuroimage* 2011, 55, 688-704, doi:10.1016/j.neuroimage.2010.11.030.
62. Li, X.; Xia, S.; Bertisch, H.C.; Branch, C.A.; Delisi, L.E. Unique topology of language processing brain network: a systems-level biomarker of schizophrenia. *Schizophr Res* 2012, 141, 128-136, doi:10.1016/j.schres.2012.07.026.
63. Latora, V.; Marchiori, M. Efficient behavior of small-world networks. *Phys Rev Lett* 2001, 87, 198701, doi:10.1103/PhysRevLett.87.198701.
64. Achard, S.; Bullmore, E. Efficiency and cost of economical brain functional networks. *PLoS Comput Biol* 2007, 3, e17, doi:10.1371/journal.pcbi.0030017.
65. Bullmore, E.; Sporns, O. Complex brain networks: graph theoretical analysis of structural and functional systems. *Nat Rev Neurosci* 2009, 10, 186-198, doi:10.1038/nrn2575.
66. Watts, D.J.; Strogatz, S.H. Collective dynamics of 'small-world' networks. *Nature* 1998, 393, 440-442, doi:10.1038/30918.
67. Sporns, O.; Honey, C.J.; Kotter, R. Identification and classification of hubs in brain networks. *PLoS One* 2007, 2, e1049, doi:10.1371/journal.pone.0001049.
68. Onnela, J.P.; Saramaki, J.; Kertesz, J.; Kaski, K. Intensity and coherence of motifs in weighted complex networks. *Phys Rev E Stat Nonlin Soft Matter Phys* 2005, 71, 065103, doi:10.1103/PhysRevE.71.065103.
69. Fan, L.; Li, H.; Zhuo, J.; Zhang, Y.; Wang, J.; Chen, L.; Yang, Z.; Chu, C.; Xie, S.; Laird, A.R.; et al. The Human Brainnetome Atlas: A New Brain Atlas Based on Connectional Architecture. *Cereb Cortex* 2016, 26, 3508-3526, doi:10.1093/cercor/bhw157.
70. Power, J.D.; Cohen, A.L.; Nelson, S.M.; Wig, G.S.; Barnes, K.A.; Church, J.A.; Vogel, A.C.; Laumann, T.O.; Miezin, F.M.; Schlaggar, B.L.; et al. Functional network organization of the human brain. *Neuron* 2011, 72, 665-678, doi:10.1016/j.neuron.2011.09.006.

71. Wig, G.S.; Laumann, T.O.; Cohen, A.L.; Power, J.D.; Nelson, S.M.; Glasser, M.F.; Miezin, F.M.; Snyder, A.Z.; Schlaggar, B.L.; Petersen, S.E. Parcellating an individual subject's cortical and subcortical brain structures using snowball sampling of rest-ing-state correlations. *Cereb Cortex* 2014, 24, 2036-2054, doi:10.1093/cercor/bht056.
72. Dunn, O.J. Multiple Comparisons among Means. *Journal of the American Statistical Association* 1961, 56, 52-64.
73. Rubinov, M.; Sporns, O. Complex network measures of brain connectivity: uses and interpretations. *Neuroimage* 2010, 52, 1059-1069, doi:10.1016/j.neuroimage.2009.10.003.
74. Emos, M.C.; Agarwal, S. Neuroanatomy, Internal Capsule. 2021 Jul 31. In: StatPearls [Internet]. Treasure Island (FL): StatPearls Publishing; 2021 Jan-. PMID: 31194338.
75. Nicole M. Gage, B.J.B. Fundamentals of Cognitive Neuroscience, 2nd ed.; Academic Press: United States, 2018.
76. George, K.; J, M.D. Neuroanatomy, Thalamocortical Radiations. 2021 Jul 31. In: StatPearls [Internet]. Treasure Island (FL): StatPearls Publishing; 2021 Jan-. PMID: 31536305.
77. Qiu, M.G.; Ye, Z.; Li, Q.Y.; Liu, G.J.; Xie, B.; Wang, J. Changes of brain structure and function in ADHD children. *Brain Topogr* 2011, 24, 243-252, doi:10.1007/s10548-010-0168-4.
78. Nagel, B.J.; Bathula, D.; Herting, M.; Schmitt, C.; Kroenke, C.D.; Fair, D.; Nigg, J.T. Altered white matter microstructure in children with attention-deficit/hyperactivity disorder. *J Am Acad Child Adolesc Psychiatry* 2011, 50, 283-292, doi:10.1016/j.jaac.2010.12.003.
79. Pavuluri, M.N.; Yang, S.; Kamineni, K.; Passarotti, A.M.; Srinivasan, G.; Harral, E.M.; Sweeney, J.A.; Zhou, X.J. Diffusion tensor imaging study of white matter fiber tracts in pediatric bipolar disorder and attention-deficit/hyperactivity disorder. *Biol Psychiatry* 2009, 65, 586-593, doi:10.1016/j.biopsych.2008.10.015.
80. Kobel, M.; Bechtel, N.; Specht, K.; Klarhofer, M.; Weber, P.; Scheffler, K.; Opwis, K.; Penner, I.K. Structural and functional imaging approaches in attention deficit/hyperactivity disorder: does the temporal lobe play a key role? *Psychiatry Res* 2010, 183, 230-236, doi:10.1016/j.psychresns.2010.03.010.
81. Scheibel, R.S.; Newsome, M.R.; Steinberg, J.L.; Pearson, D.A.; Rauch, R.A.; Mao, H.; Troyanskaya, M.; Sharma, R.G.; Levin, H.S. Altered brain activation during cognitive control in patients with moderate to severe traumatic brain injury. *Neurorehabil Neural Repair* 2007, 21, 36-45, doi:10.1177/1545968306294730.
82. Turner, G.R.; Levine, B. Augmented neural activity during executive control processing following diffuse axonal injury. *Neurology* 2008, 71, 812-818, doi:10.1212/01.wnl.0000325640.18235.1c.
83. Salmond, C.H.; Chatfield, D.A.; Menon, D.K.; Pickard, J.D.; Sahakian, B.J. Cognitive sequelae of head injury: involvement of basal forebrain and associated structures. *Brain* 2005, 128, 189-200, doi:10.1093/brain/awh352.
84. Little, D.M.; Kraus, M.F.; Joseph, J.; Geary, E.K.; Susmaras, T.; Zhou, X.J.; Pliskin, N.; Gorelick, P.B. Thalamic integrity underlies executive dysfunction in traumatic brain injury. *Neurology* 2010, 74, 558-564, doi:10.1212/WNL.0b013e3181cff5d5.

85. Grossman, E.J.; Ge, Y.; Jensen, J.H.; Babb, J.S.; Miles, L.; Reaume, J.; Silver, J.M.; Grossman, R.I.; Inglese, M. Thalamus and cognitive impairment in mild traumatic brain injury: a diffusional kurtosis imaging study. *J Neurotrauma* 2012, 29, 2318-2327, doi:10.1089/neu.2011.1763.
86. Grossman, E.J.; Jensen, J.H.; Babb, J.S.; Chen, Q.; Tabesh, A.; Fieremans, E.; Xia, D.; Inglese, M.; Grossman, R.I. Cognitive impairment in mild traumatic brain injury: a longitudinal diffusional kurtosis and perfusion imaging study. *AJNR Am J Neuroradiol* 2013, 34, 951-957, S951-953, doi:10.3174/ajnr.A3358.
87. Vargo, J.M.; Grachek, R.A.; Rockswold, G.L. Light deprivation soon after frontal brain trauma accelerates recovery from attentional deficits and promotes functional normalization of basal ganglia. *J Trauma* 1999, 47, 265-272; discussion 273-264, doi:10.1097/00005373-199908000-00008.
88. O'Phelan, K.H.; Ootoshi, C.K.; Ernst, T.; Chang, L. Common Patterns of Regional Brain Injury Detectable by Diffusion Tensor Imaging in Otherwise Normal-Appearing White Matter in Patients with Early Moderate to Severe Traumatic Brain Injury. *J Neurotrauma* 2018, 35, 739-749, doi:10.1089/neu.2016.4944.
89. Churchill, N.W.; Caverzasi, E.; Graham, S.J.; Hutchison, M.G.; Schweizer, T.A. White matter during concussion recovery: Comparing diffusion tensor imaging (DTI) and neurite orientation dispersion and density imaging (NODDI). *Hum Brain Mapp* 2019, 40, 1908-1918, doi:10.1002/hbm.24500.
90. Lindemer, E.R.; Salat, D.H.; Leritz, E.C.; McGlinchey, R.E.; Milberg, W.P. Reduced cortical thickness with increased lifetime burden of PTSD in OEF/OIF Veterans and the impact of comorbid TBI. *Neuroimage Clin* 2013, 2, 601-611, doi:10.1016/j.nicl.2013.04.009.
91. Ogren, J.A.; Tripathi, R.; Macey, P.M.; Kumar, R.; Stern, J.M.; Eliashiv, D.S.; Allen, L.A.; Diehl, B.; Engel, J., Jr.; Rani, M.R.S.; et al. Regional cortical thickness changes accompanying generalized tonic-clonic seizures. *Neuroimage Clin* 2018, 20, 205-215, doi:10.1016/j.nicl.2018.07.015.
92. Tate, D.F.; York, G.E.; Reid, M.W.; Cooper, D.B.; Jones, L.; Robin, D.A.; Kennedy, J.E.; Lewis, J. Preliminary findings of cortical thickness abnormalities in blast injured service members and their relationship to clinical findings. *Brain Imaging Behav* 2014, 8, 102-109, doi:10.1007/s11682-013-9257-9.
93. Colvin, A.C.; Mullen, J.; Lovell, M.R.; West, R.V.; Collins, M.W.; Groh, M. The role of concussion history and gender in recovery from soccer-related concussion. *Am J Sports Med* 2009, 37, 1699-1704, doi:10.1177/0363546509332497.
94. Covassin, T.; Schatz, P.; Swanik, C.B. Sex differences in neuropsychological function and post-concussion symptoms of con-cussed collegiate athletes. *Neurosurgery* 2007, 61, 345-350; discussion 350-341, doi:10.1227/01.NEU.0000279972.95060.CB.
95. Covassin, T.; Elbin, R.J.; Harris, W.; Parker, T.; Kontos, A. The role of age and sex in symptoms, neurocognitive performance, and postural stability in athletes after concussion. *Am J Sports Med* 2012, 40, 1303-1312, doi:10.1177/0363546512444554.
96. Covassin, T.; Elbin, R.J.; Bleecker, A.; Lipchik, A.; Kontos, A.P. Are there differences in neurocognitive function and symptoms between male and female soccer players after concussions? *Am J Sports Med* 2013, 41, 2890-2895, doi:10.1177/0363546513509962.



97. Fakhran, S.; Yaeger, K.; Collins, M.; Alhilali, L. Sex differences in white matter abnormalities after mild traumatic brain injury: localization and correlation with outcome. *Radiology* 2014, 272, 815-823, doi:10.1148/radiol.14132512.
98. McGlade, E.; Rogowska, J.; Yurgelun-Todd, D. Sex differences in orbitofrontal connectivity in male and female veterans with TBI. *Brain Imaging Behav* 2015, 9, 535-549, doi:10.1007/s11682-015-9379-3.
99. Goodrich-Hunsaker, N.J.; Abildskov, T.J.; Black, G.; Bigler, E.D.; Cohen, D.M.; Mihalov, L.K.; Bangert, B.A.; Taylor, H.G.; Yeates, K.O. Age- and sex-related effects in children with mild traumatic brain injury on diffusion magnetic resonance imaging properties: A comparison of voxelwise and tractography methods. *J Neurosci Res* 2018, 96, 626-641, doi:10.1002/jnr.24142.
100. Matser, J.T.; Kessels, A.G.; Lezak, M.D.; Troost, J. A dose-response relation of headers and concussions with cognitive impairment in professional soccer players. *J Clin Exp Neuropsychol* 2001, 23, 770-774, doi:10.1076/jcen.23.6.770.1029.
101. Tysvaer, A.T.; Lochen, E.A. Soccer injuries to the brain. A neuropsychologic study of former soccer players. *Am J Sports Med* 1991, 19, 56-60, doi:10.1177/036354659101900109.
102. Matser, J.T.; Kessels, A.G.; Jordan, B.D.; Lezak, M.D.; Troost, J. Chronic traumatic brain injury in professional soccer players. *Neurology* 1998, 51, 791-796, doi:10.1212/wnl.51.3.791.
103. Kontos, A.P.; Dolese, A.; Elbin, R.J.; Covassin, T.; Warren, B.L. Relationship of soccer heading to computerized neurocognitive performance and symptoms among female and male youth soccer players. *Brain Inj* 2011, 25, 1234-1241, doi:10.3109/02699052.2011.608209.
104. Kaminski, T.W.; Wikstrom, A.M.; Gutierrez, G.M.; Glutting, J.J. Purposeful heading during a season does not influence cognitive function or balance in female soccer players. *J Clin Exp Neuropsychol* 2007, 29, 742-751, doi:10.1080/13825580600976911.
105. Kaminski, T.W.; Cousino, E.S.; Glutting, J.J. Examining the relationship between purposeful heading in soccer and computerized neuropsychological test performance. *Res Q Exerc Sport* 2008, 79, 235-244, doi:10.1080/02701367.2008.10599486.
